# Supplementary material for: Epigenetic Disruption of the PIWI Pathway in Human Spermatogenic Disorders
Source: PubMed Central journal article supplement (PMC3480440; doi:10.1371/journal.pone.0047892), 2012-10-24

Figure S1

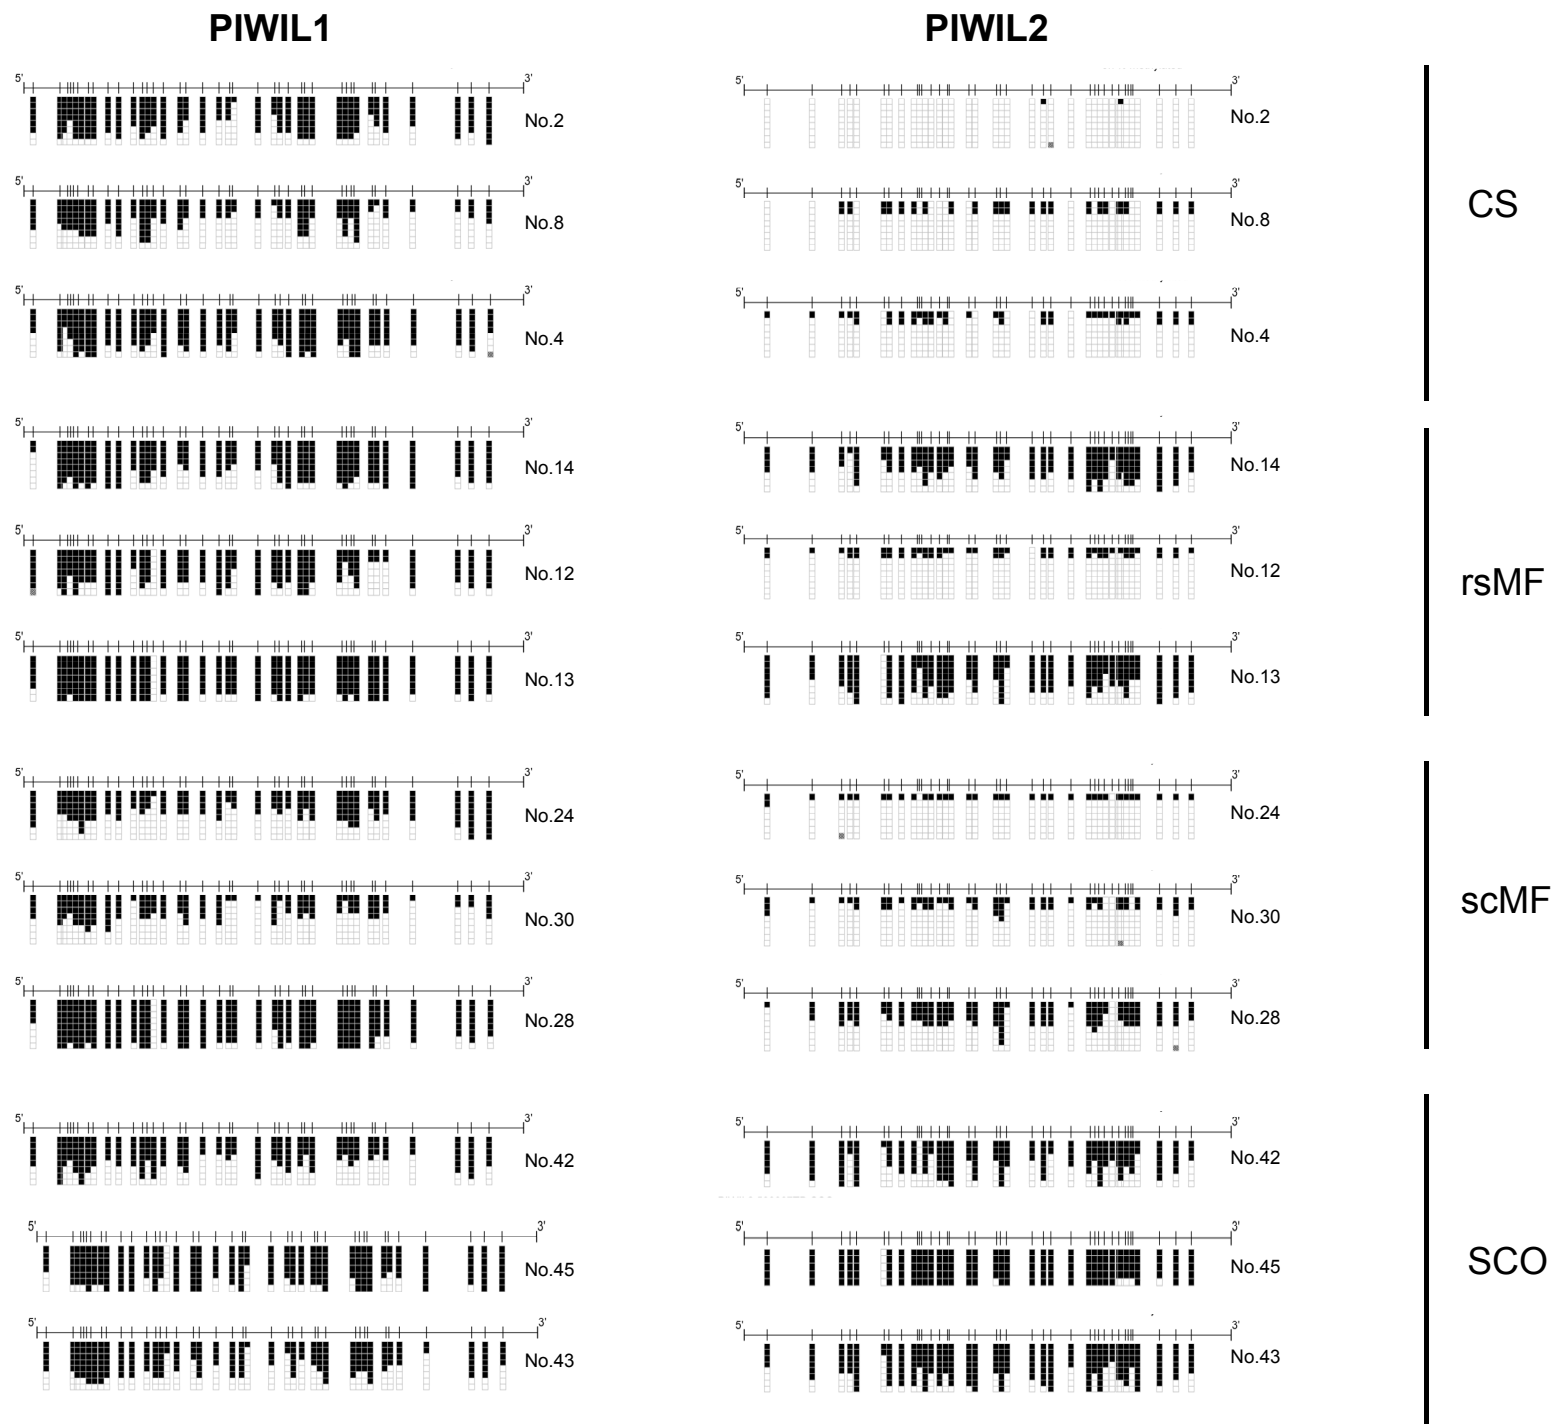

Supplement: pone.0047892.s002.pdf [file pone.0047892.s002.pdf]
