# Supplementary material for: Epigenetic Disruption of the PIWI Pathway in Human Spermatogenic Disorders
Source: PubMed Central journal article supplement (PMC3480440; doi:10.1371/journal.pone.0047892), 2012-10-24
Supplement: pone.0047892.s003.pdf [file pone.0047892.s003.pdf]

**Supplementary table S1: Primer sequences and locations**

| Gene          | BS-seq (FF)            | BS-seq (RV)            | Location                      | Size | Start       | Stop        | TSS       | TSS distance (5') | TSS distance (3') |
|---------------|------------------------|------------------------|-------------------------------|------|-------------|-------------|-----------|-------------------|-------------------|
| <i>PIWIL1</i> | GTTTGCGGGGTAGTTAATGAG  | ACCTAACACCTCAACCTAACCC | chr12:130,822,386-130,822,640 | 255  | 130,822,386 | 130,822,640 | 130822433 | -47               | 207               |
| <i>PIWIL2</i> | TATAGGGAATTTGTTGGAAAGG | CCCTACCAAAAATCTATCTCCT | chr8:22,132,691-22,133,201    | 511  | 22,132,691  | 22,133,201  | 22132810  | -119              | 391               |
| <i>TDRD1</i>  | TTGGAAAAATTTGGAAGATTTT | ACAAAATCCAAATCTCCTCTC  | chr10:115,938,773-115,939,337 | 565  | 115,938,773 | 115,939,337 | 115939029 | -256              | 308               |
| <i>TDRD9</i>  | ATATATAGGGGTTGTTAYGGAA | TACACCTCCCTAACC        | chr14:104,394,513-104,394,971 | 459  | 104,394,513 | 104,394,971 | 104394817 | -304              | 154               |

| Gene          | Pyro-seq (FF)                  | Pyro-seq (RV)             | Sequencing primer        | Size | Start       | TSS       | TSS distance (5') |
|---------------|--------------------------------|---------------------------|--------------------------|------|-------------|-----------|-------------------|
| <i>PIWIL2</i> | ATGGGTTAATTAGATAGTTTGTGTTTGTGA | AACCCACATACTCCAAAACCAATTC | AATTAGATAGTTTGTGTTTGTGAA | 106  | 22,132,759  | 22132810  | -51               |
| <i>TDRD1</i>  | AAGGAATTTTTGAGTTTGAATTAGAGTA   | ATACAAACCTCTCCCTCCCCTATA  | TTGTAATTAGAGTATAAGTTGTTT | 296  | 115,938,961 | 115939029 | -68               |

BS-seq (bisulphite-sequencing), Pyro-seq (pyro-sequencing), FF (forward primer), RV (reverse primer), TSS (transcription start site)
