# Supplementary material for: Epigenetic Disruption of the PIWI Pathway in Human Spermatogenic Disorders
Source: PubMed Central journal article supplement (PMC3480440; doi:10.1371/journal.pone.0047892), 2012-10-24
Supplement: pone.0047892.s004.pdf [file pone.0047892.s004.pdf]

**Supplementary table S2:** 633 differentially methylated CpG sites in SpF relative to normal testis tissue.

| Gene symbol | Chr. | Position  | CpG island | Probe ID   | Direction       |
|-------------|------|-----------|------------|------------|-----------------|
| NHLH2       | 1    | 116186057 | FALSE      | cg22427279 | Hypermethylated |
| IQCH        | 15   | 65325500  | FALSE      | cg22940988 | Hypermethylated |
| INSL4       | 9    | 5221360   | FALSE      | cg19297688 | Hypermethylated |
| CHST11      | 12   | 103370411 | FALSE      | cg26843567 | Hypermethylated |
| PRAMEF2     | 1    | 12838902  | FALSE      | cg18807515 | Hypermethylated |
| XAGE5       | X    | 52857461  | TRUE       | cg25993152 | Hypermethylated |
| KCNAB2      | 1    | 6008459   | TRUE       | cg13614083 | Hypermethylated |
| C6orf118    | 6    | 165643786 | FALSE      | cg05799317 | Hypermethylated |
| CRYBA4      | 22   | 25348010  | FALSE      | cg26822175 | Hypermethylated |
| AQP12A      | 2    | 241280171 | TRUE       | cg06356454 | Hypermethylated |
| STMN4       | 8    | 27172130  | FALSE      | cg02130905 | Hypermethylated |
| SLC37A1     | 21   | 42792922  | TRUE       | cg17398613 | Hypermethylated |
| MOXD1       | 6    | 132764857 | TRUE       | cg13603171 | Hypermethylated |
| NGFRAP1     | X    | 102517067 | TRUE       | cg00725777 | Hypermethylated |
| TKTL2       | 4    | 164614599 | TRUE       | cg16413535 | Hypermethylated |
| CLEC2A      | 12   | 9976203   | FALSE      | cg24820250 | Hypermethylated |
| SLC25A16    | 10   | 69958382  | TRUE       | cg08620470 | Hypermethylated |
| TCEB3C      | 18   | 42811633  | FALSE      | cg02432101 | Hypermethylated |
| C8orf45     | 8    | 67948348  | FALSE      | cg10960626 | Hypermethylated |
| CYP4F11     | 19   | 15906119  | FALSE      | cg24655310 | Hypermethylated |
| SSX5        | X    | 47941234  | TRUE       | cg23812886 | Hypermethylated |
| KLF17       | 1    | 44356937  | TRUE       | cg08679985 | Hypermethylated |
| PSG3        | 19   | 47937700  | FALSE      | cg07745725 | Hypermethylated |
| CRYGN       | 7    | 150768409 | FALSE      | cg22830895 | Hypermethylated |
| C20orf75    | 20   | 5982446   | FALSE      | cg23629496 | Hypermethylated |
| OR12D2      | 6    | 29472397  | FALSE      | cg04737405 | Hypermethylated |
| SNRPN       | 15   | 22644614  | TRUE       | cg22678136 | Hypermethylated |
| MYO18B      | 22   | 24468429  | TRUE       | cg07654843 | Hypermethylated |
| XAGE3       | X    | 52913717  | TRUE       | cg17919471 | Hypermethylated |
| C16orf33    | 16   | 42121     | TRUE       | cg14820573 | Hypermethylated |
| CRH         | 8    | 67253306  | FALSE      | cg18640030 | Hypermethylated |
| CDR1        | X    | 139694161 | FALSE      | cg08214957 | Hypermethylated |
| ENOSF1      | 18   | 703200    | TRUE       | cg16112050 | Hypermethylated |
| SYCE1       | 10   | 135232535 | TRUE       | cg17676129 | Hypermethylated |
| ZNF169      | 9    | 96080281  | FALSE      | cg15264273 | Hypermethylated |
| TBC1D22B    | 6    | 37332194  | FALSE      | cg02187357 | Hypermethylated |
| C14orf152   | 14   | 93455148  | FALSE      | cg20022541 | Hypermethylated |
| C3orf14     | 3    | 62280559  | FALSE      | cg09473585 | Hypermethylated |
| TCEB3C      | 18   | 42811593  | FALSE      | cg07008350 | Hypermethylated |

|           |    |           |       |            |                 |
|-----------|----|-----------|-------|------------|-----------------|
| PF4       | 4  | 75066510  | TRUE  | cg15158783 | Hypermethylated |
| IL2RA     | 10 | 6144318   | TRUE  | cg11733245 | Hypermethylated |
| RAB9P1    | 5  | 104462726 | FALSE | cg15453943 | Hypermethylated |
| FAM50B    | 6  | 3794271   | TRUE  | cg01570885 | Hypermethylated |
| C21orf6   | 21 | 29314090  | TRUE  | cg05406101 | Hypermethylated |
| FFAR2     | 19 | 40632702  | TRUE  | cg15479752 | Hypermethylated |
| TMPRSS3   | 21 | 42689155  | TRUE  | cg01214847 | Hypermethylated |
| ATP1A2    | 1  | 158351403 | FALSE | cg08390254 | Hypermethylated |
| POGZ      | 1  | 149699846 | FALSE | cg12647320 | Hypermethylated |
| C10orf111 | 10 | 15180418  | TRUE  | cg00260778 | Hypermethylated |
| RAB8A     | 19 | 16082719  | TRUE  | cg03621001 | Hypermethylated |
| SEPT9     | 17 | 72827828  | TRUE  | cg03330678 | Hypermethylated |
| SPACA1    | 6  | 88814597  | TRUE  | cg13334277 | Hypermethylated |
| C12orf26  | 12 | 81275119  | FALSE | cg02845923 | Hypermethylated |
| MAP4K2    | 11 | 64328475  | FALSE | cg10821722 | Hypermethylated |
| KLK4      | 19 | 56107264  | TRUE  | cg10078829 | Hypermethylated |
| USP29     | 19 | 62322503  | TRUE  | cg16547341 | Hypermethylated |
| HPN       | 19 | 40223257  | TRUE  | cg06151964 | Hypermethylated |
| NALP2     | 19 | 60169541  | TRUE  | cg16106497 | Hypermethylated |
| USP29     | 19 | 62323044  | TRUE  | cg07499372 | Hypermethylated |
| DSG3      | 18 | 27280299  | TRUE  | cg08555924 | Hypermethylated |
| PSKH2     | 8  | 87151181  | TRUE  | cg19587887 | Hypermethylated |
| ATP10A    | 15 | 23660297  | TRUE  | cg08828036 | Hypermethylated |
| C21orf77  | 21 | 32870432  | FALSE | cg13033054 | Hypermethylated |
| KRTAP17-1 | 17 | 36725264  | FALSE | cg16242770 | Hypermethylated |
| PGLYRP1   | 19 | 51218323  | TRUE  | cg10862535 | Hypermethylated |
| CCDC27    | 1  | 3659032   | FALSE | cg10051054 | Hypermethylated |
| SLN       | 11 | 107088014 | FALSE | cg17971003 | Hypermethylated |
| DIRAS3    | 1  | 68285651  | TRUE  | cg21808053 | Hypermethylated |
| FLJ23322  | 22 | 35232524  | TRUE  | cg05475277 | Hypermethylated |
| TAZ       | X  | 153292481 | FALSE | cg11331769 | Hypermethylated |
| CTAG1B    | X  | 153500553 | TRUE  | cg25531166 | Hypermethylated |
| LMO3      | 12 | 16652673  | FALSE | cg11511443 | Hypermethylated |
| MAGEB6    | X  | 26120444  | FALSE | cg10127415 | Hypermethylated |
| H2AFB3    | X  | 154342853 | TRUE  | cg06532147 | Hypermethylated |
| SNRPN     | 15 | 22674584  | TRUE  | cg25657700 | Hypermethylated |
| RCN3      | 19 | 54722273  | TRUE  | cg03907174 | Hypermethylated |
| MAGEA10   | X  | 151057709 | TRUE  | cg19964192 | Hypermethylated |
| HMGCL     | 1  | 24025361  | TRUE  | cg18888403 | Hypermethylated |
| AMHR2     | 12 | 52102542  | FALSE | cg18715299 | Hypermethylated |
| MMP13     | 11 | 102331300 | FALSE | cg13041032 | Hypermethylated |
| DDX4      | 5  | 55069371  | TRUE  | cg02899723 | Hypermethylated |
| C20orf102 | 20 | 35965510  | TRUE  | cg11599505 | Hypermethylated |
| DHX8      | 17 | 38916826  | TRUE  | cg23347958 | Hypermethylated |
| PARP12    | 7  | 139410242 | FALSE | cg24435704 | Hypermethylated |
| ZNF619    | 3  | 40493095  | FALSE | cg21942438 | Hypermethylated |
| CENTG1    | 12 | 56423446  | FALSE | cg17611475 | Hypermethylated |

|           |    |           |       |            |                 |
|-----------|----|-----------|-------|------------|-----------------|
| PEG10     | 7  | 94131716  | TRUE  | cg06943865 | Hypermethylated |
| MSH4      | 1  | 76035125  | TRUE  | cg21438018 | Hypermethylated |
| TCL1A     | 14 | 95250072  | TRUE  | cg14127336 | Hypermethylated |
| ZNF645    | X  | 22200841  | TRUE  | cg20063650 | Hypermethylated |
| DHODH     | 16 | 70598877  | TRUE  | cg22381196 | Hypermethylated |
| ZNF445    | 3  | 44494987  | FALSE | cg18129786 | Hypermethylated |
| DNAJC15   | 13 | 42494656  | TRUE  | cg00131557 | Hypermethylated |
| FAM9C     | X  | 12972572  | TRUE  | cg13918808 | Hypermethylated |
| CLDN17    | 21 | 30460420  | FALSE | cg13792279 | Hypermethylated |
| SCTR      | 2  | 119998797 | TRUE  | cg01897036 | Hypermethylated |
| MAGEA11   | X  | 148604241 | FALSE | cg00799727 | Hypermethylated |
| ZNF80     | 3  | 115440593 | FALSE | cg03109316 | Hypermethylated |
| TTLL11    | 9  | 123896217 | TRUE  | cg27218220 | Hypermethylated |
| KCNAB2    | 1  | 6009035   | TRUE  | cg19814116 | Hypermethylated |
| LOC340602 | X  | 51166482  | TRUE  | cg20931907 | Hypermethylated |
| INSL3     | 19 | 17792995  | TRUE  | cg06189133 | Hypermethylated |
| ACVRL1    | 12 | 50587901  | TRUE  | cg23640701 | Hypermethylated |
| PIWIL1    | 12 | 129388239 | TRUE  | cg13861644 | Hypermethylated |
| CYP2E1    | 10 | 135190730 | FALSE | cg00436603 | Hypermethylated |
| LRRC25    | 19 | 18370505  | FALSE | cg08379517 | Hypermethylated |
| PIWIL2    | 8  | 22188937  | TRUE  | cg18135555 | Hypermethylated |
| C8orf78   | 8  | 125252939 | TRUE  | cg05412531 | Hypermethylated |
| AP2M1     | 3  | 185374622 | FALSE | cg24661752 | Hypermethylated |
| BIRC8     | 19 | 58486766  | FALSE | cg09377486 | Hypermethylated |
| ACTL8     | 1  | 17954590  | FALSE | cg19685066 | Hypermethylated |
| MMAA      | 4  | 146778997 | TRUE  | cg25421002 | Hypermethylated |
| STK31     | 7  | 23716132  | TRUE  | cg14898779 | Hypermethylated |
| SLC25A2   | 5  | 140664331 | TRUE  | cg26783353 | Hypermethylated |
| PTPN20B   | 10 | 48448115  | TRUE  | cg02222362 | Hypermethylated |
| HPN       | 19 | 40223243  | TRUE  | cg24715735 | Hypermethylated |
| MGC15763  | 3  | 16280294  | FALSE | cg10579246 | Hypermethylated |
| FLJ22746  | 2  | 224974590 | TRUE  | cg26154999 | Hypermethylated |
| OLFM4     | 13 | 52501287  | FALSE | cg12582008 | Hypermethylated |
| KCNQ1     | 11 | 2447807   | TRUE  | cg01734338 | Hypermethylated |
| TCEB3C    | 18 | 42811405  | FALSE | cg16907024 | Hypermethylated |
| FCGR2A    | 1  | 159741600 | TRUE  | cg24422489 | Hypermethylated |
| CHM       | X  | 85190083  | FALSE | cg06340713 | Hypermethylated |
| ZNF300    | 5  | 150264078 | FALSE | cg12346881 | Hypermethylated |
| C1orf177  | 1  | 55044265  | TRUE  | cg20903926 | Hypermethylated |
| GNAS      | 20 | 56850283  | TRUE  | cg01355739 | Hypermethylated |
| CASQ2     | 1  | 116112864 | FALSE | cg18942631 | Hypermethylated |
| PKDREJ    | 22 | 45038062  | TRUE  | cg08315277 | Hypermethylated |
| GNAS      | 20 | 56861225  | TRUE  | cg17414107 | Hypermethylated |
| FOLH1     | 11 | 49187124  | TRUE  | cg06980460 | Hypermethylated |
| C9orf98   | 9  | 134745184 | FALSE | cg03382797 | Hypermethylated |
| CLTCL1    | 22 | 17660165  | TRUE  | cg07251788 | Hypermethylated |
| COQ3      | 6  | 99949074  | TRUE  | cg24831427 | Hypermethylated |

|          |    |           |       |            |                 |
|----------|----|-----------|-------|------------|-----------------|
| SLC24A5  | 15 | 46200510  | FALSE | cg01497576 | Hypermethylated |
| MAGEB2   | X  | 30143683  | TRUE  | cg17299712 | Hypermethylated |
| IMP4     | 2  | 130817933 | TRUE  | cg26385743 | Hypermethylated |
| SFRS16   | 19 | 50233032  | FALSE | cg25203561 | Hypermethylated |
| FLJ32894 | 12 | 24628518  | TRUE  | cg04926244 | Hypermethylated |
| NEK3     | 13 | 51633076  | FALSE | cg19524009 | Hypermethylated |
| C19orf33 | 19 | 43486685  | FALSE | cg00412772 | Hypermethylated |
| ELAC1    | 18 | 46747757  | TRUE  | cg11911418 | Hypermethylated |
| FLJ32569 | 1  | 204085874 | TRUE  | cg14893161 | Hypermethylated |
| MGC50273 | 2  | 132275409 | TRUE  | cg25953146 | Hypermethylated |
| GNAS     | 20 | 56860330  | TRUE  | cg03606258 | Hypermethylated |
| C8orf78  | 8  | 125252957 | TRUE  | cg00551244 | Hypermethylated |
| TFAP2E   | 1  | 35811101  | TRUE  | cg11835197 | Hypermethylated |
| GNAS     | 20 | 56862672  | TRUE  | cg21988465 | Hypermethylated |
| C20orf86 | 20 | 56236484  | FALSE | cg09898548 | Hypermethylated |
| CTHRC1   | 8  | 104453467 | TRUE  | cg19188612 | Hypermethylated |
| TAAR6    | 6  | 132933198 | TRUE  | cg12813797 | Hypermethylated |
| MAGEA9   | X  | 148671471 | FALSE | cg02649337 | Hypermethylated |
| FMO2     | 1  | 169421236 | FALSE | cg14721213 | Hypermethylated |
| FOX11    | 5  | 169465330 | TRUE  | cg19233472 | Hypermethylated |
| WDR45L   | 17 | 78200236  | TRUE  | cg10281770 | Hypermethylated |
| IL22     | 12 | 66933282  | FALSE | cg26333641 | Hypermethylated |
| CLDN8    | 21 | 30509994  | FALSE | cg04052038 | Hypermethylated |
| GPR1     | 2  | 206787397 | TRUE  | cg19132372 | Hypermethylated |
| PLG      | 6  | 161043793 | FALSE | cg09087901 | Hypermethylated |
| SPATA16  | 3  | 174341716 | TRUE  | cg01216369 | Hypermethylated |
| PSG1     | 19 | 48076917  | FALSE | cg25839766 | Hypermethylated |
| USP52    | 12 | 55015247  | TRUE  | cg26265187 | Hypermethylated |
| PSMC5    | 17 | 59257059  | FALSE | cg07117700 | Hypermethylated |
| FAM9A    | X  | 8729528   | TRUE  | cg00600110 | Hypermethylated |
| CCDC19   | 1  | 158135847 | TRUE  | cg09451092 | Hypermethylated |
| KRT6E    | 12 | 51154060  | FALSE | cg08136806 | Hypermethylated |
| FRG1     | 4  | 191099164 | TRUE  | cg01737532 | Hypermethylated |
| HAT1     | 2  | 172486678 | TRUE  | cg24611092 | Hypermethylated |
| ZNF22    | 10 | 44815441  | FALSE | cg01614759 | Hypermethylated |
| SLC35D2  | 9  | 98186585  | TRUE  | cg22324153 | Hypermethylated |
| MGC40168 | 1  | 6219715   | TRUE  | cg06940574 | Hypermethylated |
| TM4SF19  | 3  | 197549966 | FALSE | cg05445326 | Hypermethylated |
| CTNNA3   | 10 | 69126313  | FALSE | cg00132141 | Hypermethylated |
| GCN5L2   | 17 | 37527341  | TRUE  | cg04278905 | Hypermethylated |
| TEX13B   | X  | 107112286 | FALSE | cg10857345 | Hypermethylated |
| OSCAR    | 19 | 59297454  | TRUE  | cg21098323 | Hypermethylated |
| NNAT     | 20 | 35583475  | TRUE  | cg10642330 | Hypermethylated |
| C8orf31  | 8  | 144192081 | FALSE | cg04612566 | Hypermethylated |
| MBP      | 18 | 72974410  | TRUE  | cg12555907 | Hypermethylated |
| VTI1B    | 14 | 67212286  | TRUE  | cg04269351 | Hypermethylated |
| ZIM2     | 19 | 61998893  | TRUE  | cg06244906 | Hypermethylated |

|               |    |           |       |            |                 |
|---------------|----|-----------|-------|------------|-----------------|
| SEMA3B        | 3  | 50289658  | TRUE  | cg13550608 | Hypermethylated |
| UBE2U         | 1  | 64442187  | TRUE  | cg10753073 | Hypermethylated |
| GNAS          | 20 | 56860144  | TRUE  | cg15160445 | Hypermethylated |
| KRTCAP3       | 2  | 27519047  | TRUE  | cg11618577 | Hypermethylated |
| HLA-DRB5      | 6  | 32606582  | FALSE | cg10746737 | Hypermethylated |
| IL13RA2       | X  | 114159571 | FALSE | cg00488364 | Hypermethylated |
| OR2A4         | 6  | 132064183 | FALSE | cg17026542 | Hypermethylated |
| HDAC11        | 3  | 13497740  | TRUE  | cg05446471 | Hypermethylated |
| IL20RA        | 6  | 137408015 | TRUE  | cg22487322 | Hypermethylated |
| TPCN2         | 11 | 68572025  | TRUE  | cg22484980 | Hypermethylated |
| BRDT          | 1  | 92187310  | TRUE  | cg14732540 | Hypermethylated |
| ATP9A         | 20 | 49819573  | FALSE | cg05851042 | Hypermethylated |
| LOC201164     | 17 | 17050295  | TRUE  | cg05590257 | Hypermethylated |
| ATP10A        | 15 | 23523421  | TRUE  | cg12582965 | Hypermethylated |
| C11orf47      | 11 | 6474863   | TRUE  | cg25368651 | Hypermethylated |
| SNRPN         | 15 | 22674642  | TRUE  | cg24993443 | Hypermethylated |
| RAI16         | 8  | 22002058  | FALSE | cg24471555 | Hypermethylated |
| HPS1          | 10 | 100196915 | TRUE  | cg20340596 | Hypermethylated |
| DNAH8         | 6  | 38798856  | TRUE  | cg24760768 | Hypermethylated |
| CREBBP        | 16 | 3871886   | TRUE  | cg03264209 | Hypermethylated |
| MAGEA2        | X  | 151672941 | TRUE  | cg01743008 | Hypermethylated |
| TCEB3C        | 18 | 42811817  | FALSE | cg08008233 | Hypermethylated |
| DPM1          | 20 | 49009813  | TRUE  | cg16332224 | Hypermethylated |
| GALNTL5       | 7  | 151284387 | FALSE | cg11091262 | Hypermethylated |
| DKFZP779L1558 | 12 | 28301371  | FALSE | cg17489451 | Hypermethylated |
| UBD           | 6  | 29636098  | FALSE | cg07326586 | Hypermethylated |
| SFN           | 1  | 27062374  | TRUE  | cg03421300 | Hypermethylated |
| RABGEF1       | 7  | 65842232  | FALSE | cg18884741 | Hypermethylated |
|               | 3  | 144378065 | TRUE  | cg10883352 | Hypermethylated |
| MGC3207       | 19 | 13736430  | TRUE  | cg20555481 | Hypermethylated |
| BCL2          | 18 | 59054814  | TRUE  | cg08223235 | Hypermethylated |
| MAPK13        | 6  | 36205670  | FALSE | cg05859264 | Hypermethylated |
| IKBKAP        | 9  | 110737466 | FALSE | cg25018881 | Hypermethylated |
| ZNF678        | 1  | 225817515 | TRUE  | cg26683023 | Hypermethylated |
| TM4SF19       | 3  | 197549503 | FALSE | cg05556202 | Hypermethylated |
| GPRC5D        | 12 | 12994922  | FALSE | cg12800145 | Hypermethylated |
| NTSR1         | 20 | 60811330  | TRUE  | cg14871138 | Hypermethylated |
| FRK           | 6  | 116488302 | FALSE | cg16176600 | Hypermethylated |
| C14orf58      | 14 | 75115101  | TRUE  | cg04001333 | Hypermethylated |
| RAB24         | 5  | 176664728 | FALSE | cg13284426 | Hypermethylated |
| NPFFR2        | 4  | 73116145  | FALSE | cg03017946 | Hypermethylated |
| SMPD3         | 16 | 67040695  | TRUE  | cg17217677 | Hypermethylated |
| GPATC1        | 19 | 38263092  | FALSE | cg10108208 | Hypermethylated |
| SPAG7         | 17 | 4813327   | TRUE  | cg12815142 | Hypermethylated |
| CHM           | X  | 85189965  | FALSE | cg25488547 | Hypermethylated |
| GPR39         | 2  | 132891105 | TRUE  | cg07785936 | Hypermethylated |
| CLEC2A        | 12 | 9976441   | FALSE | cg27190239 | Hypermethylated |

|           |    |           |       |             |                 |
|-----------|----|-----------|-------|-------------|-----------------|
| ZBTB40    | 1  | 22650259  | TRUE  | cg26870337  | Hypermethylated |
| GPKOW     | X  | 48867638  | TRUE  | cg17705081  | Hypermethylated |
| HIST1H2AA | 6  | 25834576  | TRUE  | cg01307730  | Hypermethylated |
| CNGA1     | 4  | 47650768  | TRUE  | cg19000186  | Hypermethylated |
| KRTAP19-5 | 21 | 30797319  | FALSE | cg07374637  | Hypermethylated |
| GAS6      | 13 | 113545690 | TRUE  | cg14358743  | Hypermethylated |
| CLPB      | 11 | 71823904  | TRUE  | cg05812599  | Hypermethylated |
| PDF       | 16 | 67922724  | TRUE  | cg12897458  | Hypermethylated |
| MAGEC1    | X  | 140819380 | TRUE  | cg111110686 | Hypermethylated |
| OXA1L     | 14 | 22304812  | TRUE  | cg20782689  | Hypermethylated |
| HOXD3     | 2  | 176735887 | TRUE  | cg18702197  | Hypermethylated |
| GPR45     | 2  | 105224921 | TRUE  | cg22253945  | Hypermethylated |
| PROCA1    | 17 | 24063650  | TRUE  | cg04578090  | Hypermethylated |
| DNAJC15   | 13 | 42494577  | TRUE  | cg11679069  | Hypermethylated |
| GLRA2     | X  | 14457801  | FALSE | cg05206587  | Hypermethylated |
| PNMA6A    | X  | 151990896 | TRUE  | cg06904813  | Hypermethylated |
| VCY       | Y  | 14677478  | TRUE  | cg15812957  | Hypermethylated |
| FKBP4     | 12 | 2773051   | TRUE  | cg11518240  | Hypermethylated |
| TMPRSS3   | 21 | 42689424  | TRUE  | cg25608949  | Hypermethylated |
| BOK       | 2  | 242146552 | TRUE  | cg00603172  | Hypermethylated |
| COPA      | 1  | 158580685 | FALSE | cg08015496  | Hypermethylated |
| HNF4A     | 20 | 42418292  | TRUE  | cg19717150  | Hypermethylated |
| KLF17     | 1  | 44357517  | TRUE  | cg18202456  | Hypermethylated |
| UBD       | 6  | 29635984  | FALSE | cg15320474  | Hypermethylated |
| GGTLA4    | 20 | 23917432  | TRUE  | cg13424446  | Hypermethylated |
| OR2A4     | 6  | 132064978 | FALSE | cg11884699  | Hypermethylated |
| ACP1      | 2  | 255872    | FALSE | cg27226618  | Hypermethylated |
| RB1       | 13 | 47793479  | TRUE  | cg07880715  | Hypermethylated |
| SLC13A4   | 7  | 135063389 | FALSE | cg02005755  | Hypermethylated |
| TMEM43    | 3  | 14140187  | FALSE | cg14375111  | Hypermethylated |
| FANCG     | 9  | 35070812  | TRUE  | cg05293216  | Hypermethylated |
| AMPD3     | 11 | 10427725  | TRUE  | cg08035082  | Hypermethylated |
| PDE4C     | 19 | 18205322  | TRUE  | cg13899108  | Hypermethylated |
| C6orf55   | 6  | 142508736 | FALSE | cg10035272  | Hypermethylated |
| C9orf41   | 9  | 76834070  | TRUE  | cg18168989  | Hypermethylated |
| TOLLIP    | 11 | 1288312   | TRUE  | cg22424444  | Hypermethylated |
| ASZ1      | 7  | 116854652 | TRUE  | cg16540704  | Hypermethylated |
| NSUN3     | 3  | 95263136  | TRUE  | cg04032566  | Hypermethylated |
| C15orf24  | 15 | 32182832  | FALSE | cg18099844  | Hypermethylated |
| ZIM2      | 19 | 61998659  | TRUE  | cg16519742  | Hypermethylated |
| MAGEA4    | X  | 150831952 | TRUE  | cg22497867  | Hypermethylated |
| C21orf56  | 21 | 46429602  | TRUE  | cg10296238  | Hypermethylated |
| LOC348840 | 3  | 199293030 | TRUE  | cg02141570  | Hypermethylated |
| ILDR1     | 3  | 123224320 | TRUE  | cg04059863  | Hypermethylated |
| DUS4L     | 7  | 106990684 | FALSE | cg19770955  | Hypermethylated |
| PRDM2     | 1  | 13902462  | FALSE | cg25402049  | Hypermethylated |
| BCL2      | 18 | 59055308  | TRUE  | cg25059899  | Hypermethylated |

|           |    |           |       |            |                 |
|-----------|----|-----------|-------|------------|-----------------|
| CYP26C1   | 10 | 94809792  | TRUE  | cg26404725 | Hypermethylated |
| ZCCHC13   | X  | 73440678  | TRUE  | cg04211807 | Hypermethylated |
| SEMA6B    | 19 | 4509119   | TRUE  | cg10052840 | Hypermethylated |
| FLJ25421  | 22 | 38619484  | TRUE  | cg08245789 | Hypermethylated |
| TCEB3B    | 18 | 42815723  | TRUE  | cg24883732 | Hypermethylated |
| DMRTC1    | X  | 72014324  | FALSE | cg25268283 | Hypermethylated |
| TMEM45B   | 11 | 129190572 | FALSE | cg18913951 | Hypermethylated |
| DHX40     | 17 | 54997457  | TRUE  | cg18062196 | Hypermethylated |
| PLAGL1    | 6  | 144371522 | TRUE  | cg17895149 | Hypermethylated |
| C14orf11  | 14 | 34079243  | TRUE  | cg24276491 | Hypermethylated |
| AKR1C1    | 10 | 4994250   | FALSE | cg07639198 | Hypermethylated |
| PTPN20B   | 10 | 48448112  | TRUE  | cg16192575 | Hypermethylated |
| UCN       | 2  | 27384674  | TRUE  | cg04527918 | Hypermethylated |
| SETBP1    | 18 | 40535761  | FALSE | cg00037763 | Hypermethylated |
| GLRX2     | 1  | 191341814 | FALSE | cg15361231 | Hypermethylated |
| TCEB3B    | 18 | 42816134  | TRUE  | cg20879768 | Hypermethylated |
| KEAP1     | 19 | 10476199  | TRUE  | cg03754063 | Hypermethylated |
| PAGE1     | X  | 49347342  | TRUE  | cg23937047 | Hypermethylated |
| HIST1H1T  | 6  | 26216314  | TRUE  | cg19515446 | Hypermethylated |
| LOC223075 | 7  | 31523600  | TRUE  | cg25650811 | Hypermethylated |
| ACTL7B    | 9  | 110657950 | TRUE  | cg05156613 | Hypermethylated |
| ZFYVE19   | 15 | 38885547  | FALSE | cg03012280 | Hypermethylated |
| GRB10     | 7  | 50817425  | TRUE  | cg08835688 | Hypermethylated |
| SGCB      | 4  | 52599782  | TRUE  | cg12489960 | Hypermethylated |
| MGC27016  | 4  | 155921670 | TRUE  | cg02992596 | Hypermethylated |
| SLC6A14   | X  | 115482720 | FALSE | cg00894577 | Hypermethylated |
| HEPH      | X  | 65299801  | FALSE | cg08021299 | Hypermethylated |
| MAN2C1    | 15 | 73448502  | TRUE  | cg04008455 | Hypermethylated |
| ARD1A     | X  | 152854847 | TRUE  | cg00434413 | Hypermethylated |
| MAGEA3    | X  | 151688792 | TRUE  | cg16390856 | Hypermethylated |
| MAGEA1    | X  | 152139132 | FALSE | cg23776892 | Hypermethylated |
| ADCY2     | 5  | 7448318   | TRUE  | cg04907257 | Hypermethylated |
| INDOL1    | 8  | 39910381  | FALSE | cg16957569 | Hypomethylated  |
| DCN       | 12 | 90100572  | FALSE | cg04088433 | Hypomethylated  |
| IKBKE     | 1  | 204710788 | FALSE | cg22577136 | Hypomethylated  |
| CCL26     | 7  | 75257240  | FALSE | cg05556717 | Hypomethylated  |
| ABCA8     | 17 | 64462140  | FALSE | cg21660392 | Hypomethylated  |
| OBP2A     | 9  | 137577873 | FALSE | cg15092802 | Hypomethylated  |
| REG1B     | 2  | 79168253  | FALSE | cg07841014 | Hypomethylated  |
| C1R       | 12 | 7136253   | FALSE | cg16236875 | Hypomethylated  |
| FLJ39501  | 19 | 15479559  | FALSE | cg14851685 | Hypomethylated  |
| CYP4F3    | 19 | 15612167  | FALSE | cg16377880 | Hypomethylated  |
| C16orf30  | 16 | 1522582   | FALSE | cg17706173 | Hypomethylated  |
| MARK2     | 11 | 63412666  | FALSE | cg06204948 | Hypomethylated  |
| TSPAN8    | 12 | 69838455  | FALSE | cg15684563 | Hypomethylated  |
| THBS3     | 1  | 153443575 | FALSE | cg25912717 | Hypomethylated  |
| SH3PX3    | 15 | 73728631  | FALSE | cg27635271 | Hypomethylated  |

|          |    |           |       |            |                |
|----------|----|-----------|-------|------------|----------------|
| TMEM10   | 10 | 98109069  | FALSE | cg06825166 | Hypomethylated |
| BST2     | 19 | 17377470  | FALSE | cg01254505 | Hypomethylated |
| NOTCH4   | 6  | 32299818  | FALSE | cg14700707 | Hypomethylated |
| BRD4     | 19 | 15252927  | TRUE  | cg08044694 | Hypomethylated |
| MGMT     | 10 | 131302691 | TRUE  | cg18488970 | Hypomethylated |
| CLDN20   | 6  | 155626401 | FALSE | cg17306637 | Hypomethylated |
| HYMAI    | 6  | 144376426 | FALSE | cg08256027 | Hypomethylated |
| GPR156   | 3  | 121445898 | FALSE | cg19093820 | Hypomethylated |
| RRH      | 4  | 110967856 | FALSE | cg19428735 | Hypomethylated |
| PROK1    | 1  | 110795047 | FALSE | cg18434152 | Hypomethylated |
| MYO1F    | 19 | 8549540   | FALSE | cg16504798 | Hypomethylated |
| AQP10    | 1  | 152560106 | FALSE | cg20713492 | Hypomethylated |
| CST9L    | 20 | 23496991  | FALSE | cg15210427 | Hypomethylated |
| PDGFRB   | 5  | 149515888 | TRUE  | cg12727795 | Hypomethylated |
| S100A16  | 1  | 151851544 | FALSE | cg23499956 | Hypomethylated |
| TNKS1BP1 | 11 | 56845942  | FALSE | cg24855780 | Hypomethylated |
| CCL18    | 17 | 31415591  | FALSE | cg08214029 | Hypomethylated |
| ID3      | 1  | 23758594  | TRUE  | cg22258437 | Hypomethylated |
| AQP5     | 12 | 48640218  | FALSE | cg19220825 | Hypomethylated |
| HSD3B7   | 16 | 30904131  | FALSE | cg10917602 | Hypomethylated |
| LGALS8   | 1  | 234746847 | FALSE | cg03082060 | Hypomethylated |
| PARVG    | 22 | 42906788  | FALSE | cg26861460 | Hypomethylated |
| TESC     | 12 | 116022841 | FALSE | cg06750167 | Hypomethylated |
| CLEC4F   | 2  | 70901157  | FALSE | cg21148892 | Hypomethylated |
| UBE1L    | 3  | 49826443  | FALSE | cg09874127 | Hypomethylated |
| CA9      | 9  | 35663909  | FALSE | cg19257550 | Hypomethylated |
| C1orf182 | 1  | 154572288 | FALSE | cg24042452 | Hypomethylated |
| TIMD4    | 5  | 156322277 | FALSE | cg18994063 | Hypomethylated |
| KLK1     | 19 | 56019168  | FALSE | cg26415633 | Hypomethylated |
| CLEC3B   | 3  | 45041975  | FALSE | cg21057494 | Hypomethylated |
| SLC6A12  | 12 | 192511    | FALSE | cg20938359 | Hypomethylated |
| C8orf4   | 8  | 40129600  | FALSE | cg17939444 | Hypomethylated |
| RSAD2    | 2  | 6935238   | FALSE | cg18201077 | Hypomethylated |
| FKBP9L   | 7  | 55724354  | TRUE  | cg11808544 | Hypomethylated |
| OSBPL7   | 17 | 43254772  | FALSE | cg09911755 | Hypomethylated |
| CLEC10A  | 17 | 6924715   | FALSE | cg01472101 | Hypomethylated |
| PRG1     | 10 | 70517405  | FALSE | cg27208307 | Hypomethylated |
| ARPM2    | 1  | 2927859   | FALSE | cg04716261 | Hypomethylated |
| C4orf18  | 4  | 159313291 | FALSE | cg25841987 | Hypomethylated |
| CARD14   | 17 | 75766923  | TRUE  | cg05187322 | Hypomethylated |
| TNNI3    | 19 | 60360903  | FALSE | cg03097995 | Hypomethylated |
| FLJ43582 | 8  | 38505134  | FALSE | cg23843812 | Hypomethylated |
| SPARCL1  | 4  | 88669530  | FALSE | cg19466563 | Hypomethylated |
| TNFRSF4  | 1  | 1138954   | TRUE  | cg22335801 | Hypomethylated |
| C10orf10 | 10 | 44793718  | FALSE | cg04444771 | Hypomethylated |
| TFF3     | 21 | 42608574  | FALSE | cg04806409 | Hypomethylated |
| TRPV6    | 7  | 142293853 | FALSE | cg16752583 | Hypomethylated |



|          |    |           |       |            |                |
|----------|----|-----------|-------|------------|----------------|
| EMP1     | 12 | 13240991  | FALSE | cg14409083 | Hypomethylated |
| MRGPRF   | 11 | 68536712  | FALSE | cg22933847 | Hypomethylated |
| SLC17A4  | 6  | 25862169  | FALSE | cg21627181 | Hypomethylated |
| BCMO1    | 16 | 79829782  | FALSE | cg22947000 | Hypomethylated |
| HFE2     | 1  | 144124550 | FALSE | cg06589885 | Hypomethylated |
| CLEC2B   | 12 | 9913702   | FALSE | cg17475456 | Hypomethylated |
| XPNPEP2  | X  | 128700621 | FALSE | cg23026995 | Hypomethylated |
| IL17RC   | 3  | 9934128   | FALSE | cg07705835 | Hypomethylated |
| FLJ20273 | 4  | 40212781  | TRUE  | cg01704534 | Hypomethylated |
| MGC18079 | 16 | 27806987  | FALSE | cg26062370 | Hypomethylated |
| NCALD    | 8  | 102872413 | FALSE | cg17084151 | Hypomethylated |
| FLJ11000 | 7  | 134483310 | FALSE | cg13120814 | Hypomethylated |
| RANBP1   | 22 | 18483649  | TRUE  | cg11594228 | Hypomethylated |
| SNX26    | 19 | 40958680  | TRUE  | cg03007010 | Hypomethylated |
| IL19     | 1  | 205037818 | FALSE | cg12380764 | Hypomethylated |
| TRIM54   | 2  | 27358950  | FALSE | cg25218351 | Hypomethylated |
| ITGAD    | 16 | 31312602  | FALSE | cg02164442 | Hypomethylated |
| NFAM1    | 22 | 41158069  | FALSE | cg17568996 | Hypomethylated |
| INHBE    | 12 | 56135537  | FALSE | cg20664201 | Hypomethylated |
| TNS1     | 2  | 218516897 | FALSE | cg18328334 | Hypomethylated |
| GPR24    | 22 | 39405619  | FALSE | cg21342728 | Hypomethylated |
| MR1      | 1  | 179269292 | FALSE | cg01040850 | Hypomethylated |
| FLJ43582 | 8  | 38505392  | FALSE | cg11653466 | Hypomethylated |
| NYX      | X  | 41191215  | FALSE | cg18230216 | Hypomethylated |
| SDSL     | 12 | 112344252 | FALSE | cg05149586 | Hypomethylated |
| CSF1R    | 5  | 149472673 | FALSE | cg07260017 | Hypomethylated |
| GDF3     | 12 | 7739914   | FALSE | cg22956254 | Hypomethylated |
| OIT3     | 10 | 74323455  | FALSE | cg05998983 | Hypomethylated |
| RUFY3    | 4  | 71806586  | FALSE | cg06059810 | Hypomethylated |
| FLRT3    | 20 | 14266410  | FALSE | cg26082838 | Hypomethylated |
| IL31RA   | 5  | 55185257  | FALSE | cg15091410 | Hypomethylated |
| RDH12    | 14 | 67259210  | FALSE | cg04394967 | Hypomethylated |
| TMEM86B  | 19 | 60432000  | FALSE | cg26457013 | Hypomethylated |
| C20orf75 | 20 | 5983139   | FALSE | cg01869233 | Hypomethylated |
| CTSS     | 1  | 149004797 | FALSE | cg08578023 | Hypomethylated |
| ACAT2    | 6  | 160102428 | TRUE  | cg15298323 | Hypomethylated |
| IL1B     | 2  | 113310846 | FALSE | cg07935264 | Hypomethylated |
| SERPINE1 | 7  | 100557134 | FALSE | cg02273392 | Hypomethylated |
| SNCG     | 10 | 88708373  | TRUE  | cg21012874 | Hypomethylated |
| CDCP2    | 1  | 54392033  | TRUE  | cg26185508 | Hypomethylated |
| ELSPBP1  | 19 | 53189549  | FALSE | cg08981777 | Hypomethylated |
| SLC25A18 | 22 | 16423043  | FALSE | cg02555579 | Hypomethylated |
| PSPN     | 19 | 6327576   | FALSE | cg10280342 | Hypomethylated |
| WFDC13   | 20 | 43764255  | FALSE | cg09874776 | Hypomethylated |
| WFDC10A  | 20 | 43691798  | FALSE | cg02605634 | Hypomethylated |
| HTR2A    | 13 | 46367655  | FALSE | cg00308665 | Hypomethylated |
| NALP10   | 11 | 7941549   | FALSE | cg18484189 | Hypomethylated |

|           |    |           |       |            |                |
|-----------|----|-----------|-------|------------|----------------|
| MVP       | 16 | 29732100  | FALSE | cg00334507 | Hypomethylated |
| OR5P2     | 11 | 7774741   | FALSE | cg13410437 | Hypomethylated |
| DKK4      | 8  | 42354132  | FALSE | cg21209091 | Hypomethylated |
| WFDC10A   | 20 | 43691851  | FALSE | cg11953868 | Hypomethylated |
| CTRL      | 16 | 66523368  | FALSE | cg04413148 | Hypomethylated |
| HAS1      | 19 | 56919850  | TRUE  | cg13300756 | Hypomethylated |
| CX3CL1    | 16 | 55964456  | FALSE | cg15195412 | Hypomethylated |
| SH3TC2    | 5  | 148422887 | FALSE | cg01965939 | Hypomethylated |
| MID1      | X  | 10761548  | FALSE | cg20244073 | Hypomethylated |
| PAQR7     | 1  | 26070442  | FALSE | cg15662251 | Hypomethylated |
| SLC2A5    | 1  | 9052074   | FALSE | cg03679305 | Hypomethylated |
| FCRLM2    | 1  | 159959712 | FALSE | cg27495845 | Hypomethylated |
| BTN3A2    | 6  | 26472772  | FALSE | cg14345882 | Hypomethylated |
| FLJ35784  | 19 | 7468351   | FALSE | cg16732901 | Hypomethylated |
| ACVR1     | 2  | 158403404 | FALSE | cg09499849 | Hypomethylated |
| UGT2B17   | 4  | 69116277  | FALSE | cg19481811 | Hypomethylated |
| KIAA1822L | 1  | 220787998 | FALSE | cg20582779 | Hypomethylated |
| KLHL6     | 3  | 184756501 | FALSE | cg20398399 | Hypomethylated |
| BTK       | X  | 100527943 | FALSE | cg03791917 | Hypomethylated |
| FLJ35785  | 15 | 20806668  | FALSE | cg06907544 | Hypomethylated |
| TNFSF15   | 9  | 116608409 | FALSE | cg10791260 | Hypomethylated |
| SEPP1     | 5  | 42847709  | FALSE | cg04502814 | Hypomethylated |
| CLIC2     | X  | 154217162 | FALSE | cg21248478 | Hypomethylated |
| C20orf160 | 20 | 30062162  | FALSE | cg24691461 | Hypomethylated |
| C20orf38  | 20 | 12937844  | FALSE | cg25125453 | Hypomethylated |
| FLJ37538  | 7  | 99920258  | FALSE | cg08626653 | Hypomethylated |
| EPHX1     | 1  | 224079633 | FALSE | cg03459809 | Hypomethylated |
| TDG       | 12 | 102883862 | TRUE  | cg03923277 | Hypomethylated |
| PLA2G1B   | 12 | 119250606 | FALSE | cg16396488 | Hypomethylated |
| FYB       | 5  | 39255455  | FALSE | cg13703437 | Hypomethylated |
| POT1      | 7  | 124325896 | FALSE | cg21792432 | Hypomethylated |
| DMBT1     | 10 | 124310054 | FALSE | cg11976790 | Hypomethylated |
| FLJ35725  | 4  | 8491500   | TRUE  | cg14430151 | Hypomethylated |
| RDH5      | 12 | 54400422  | FALSE | cg02192520 | Hypomethylated |
| SLC23A1   | 5  | 138747273 | FALSE | cg25374813 | Hypomethylated |
| OSBPL7    | 17 | 43254387  | FALSE | cg23452458 | Hypomethylated |
| BGN       | X  | 152414100 | TRUE  | cg19618706 | Hypomethylated |
| NR1H4     | 12 | 99391889  | FALSE | cg23256150 | Hypomethylated |
| PHKG1     | 7  | 56128181  | FALSE | cg19759064 | Hypomethylated |
| C1R       | 12 | 7137031   | FALSE | cg15776355 | Hypomethylated |
| DDT       | 22 | 22652308  | TRUE  | cg24599739 | Hypomethylated |
| NFKBIB    | 19 | 44081059  | FALSE | cg27442349 | Hypomethylated |
| SCN2A2    | 2  | 165858646 | FALSE | cg08347960 | Hypomethylated |
| LIX1      | 5  | 96504251  | FALSE | cg06213287 | Hypomethylated |
| SOX15     | 17 | 7434875   | FALSE | cg13098960 | Hypomethylated |
| RHO       | 3  | 130729613 | FALSE | cg13180098 | Hypomethylated |
| KRT6A     | 12 | 51174747  | FALSE | cg11471401 | Hypomethylated |

|           |    |           |       |            |                |
|-----------|----|-----------|-------|------------|----------------|
| PLEKHA6   | 1  | 202595930 | FALSE | cg21581873 | Hypomethylated |
| PRTN3     | 19 | 790689    | FALSE | cg00615241 | Hypomethylated |
| PAX1      | 20 | 21627525  | FALSE | cg20907471 | Hypomethylated |
| TSPAN1    | 1  | 46418284  | FALSE | cg26294850 | Hypomethylated |
| DAND5     | 19 | 12941409  | FALSE | cg15177917 | Hypomethylated |
| CEACAM4   | 19 | 46825249  | FALSE | cg10237469 | Hypomethylated |
| RIN1      | 11 | 65860501  | FALSE | cg05998426 | Hypomethylated |
| PRAMEF1   | 1  | 12773517  | FALSE | cg05372736 | Hypomethylated |
| PHACTR4   | 1  | 28637110  | FALSE | cg08123074 | Hypomethylated |
| P8        | 16 | 28458120  | FALSE | cg15149645 | Hypomethylated |
| UPK3B     | 7  | 75977406  | FALSE | cg22995176 | Hypomethylated |
| SLC2A5    | 1  | 9052378   | FALSE | cg24480859 | Hypomethylated |
| ELSPBP1   | 19 | 53189843  | FALSE | cg19404979 | Hypomethylated |
| C3        | 19 | 6672016   | FALSE | cg17612991 | Hypomethylated |
| FAM107A   | 3  | 58538649  | FALSE | cg01446393 | Hypomethylated |
| KLK10     | 19 | 56215362  | FALSE | cg06130787 | Hypomethylated |
| IL16      | 15 | 79262693  | FALSE | cg01001286 | Hypomethylated |
| SLAMF8    | 1  | 158063058 | FALSE | cg04275881 | Hypomethylated |
| EPS8L1    | 19 | 60274447  | FALSE | cg27105123 | Hypomethylated |
| IL22RA1   | 1  | 24342151  | FALSE | cg09152089 | Hypomethylated |
| TNFRSF19  | 13 | 23042257  | FALSE | cg06150803 | Hypomethylated |
| DDR2      | 1  | 160868431 | FALSE | cg17496788 | Hypomethylated |
| ATP13A4   | 3  | 194755472 | TRUE  | cg23159337 | Hypomethylated |
| CLEC3B    | 3  | 45042792  | FALSE | cg06117855 | Hypomethylated |
| LOC348174 | 16 | 68542440  | TRUE  | cg17091851 | Hypomethylated |
| PDE2A     | 11 | 72062723  | FALSE | cg22635155 | Hypomethylated |
| GARNL3    | 9  | 129066841 | FALSE | cg00342530 | Hypomethylated |
| C17orf73  | 17 | 46200721  | FALSE | cg18490846 | Hypomethylated |
| SMPDL3B   | 1  | 28134139  | FALSE | cg00605270 | Hypomethylated |
| MOCS1     | 6  | 40003649  | FALSE | cg03422350 | Hypomethylated |
| PLA2G1B   | 12 | 119250101 | FALSE | cg18133966 | Hypomethylated |
| FGF7      | 15 | 47503539  | FALSE | cg27525902 | Hypomethylated |
| LTC4S     | 5  | 179153696 | FALSE | cg11394785 | Hypomethylated |
| MBD3L1    | 19 | 8814473   | FALSE | cg13727946 | Hypomethylated |
| C1orf38   | 1  | 28078513  | FALSE | cg08623383 | Hypomethylated |
| PKD1      | 16 | 2126256   | TRUE  | cg18130100 | Hypomethylated |
| C10orf10  | 10 | 44794323  | FALSE | cg17186163 | Hypomethylated |
| C7        | 5  | 40945289  | FALSE | cg09179845 | Hypomethylated |
| CXCL10    | 4  | 77163809  | FALSE | cg01288089 | Hypomethylated |
| PGAM2     | 7  | 44071959  | FALSE | cg23616741 | Hypomethylated |
| SNAPC4    | 9  | 138413179 | FALSE | cg24812167 | Hypomethylated |
| SLCO2B1   | 11 | 74539775  | FALSE | cg27104271 | Hypomethylated |
| HLA-DPA1  | 6  | 33148892  | FALSE | cg13906813 | Hypomethylated |
| YPEL4     | 11 | 57174550  | FALSE | cg22705929 | Hypomethylated |
| FLJ23447  | 19 | 13910018  | FALSE | cg07425555 | Hypomethylated |
| PRAP1     | 10 | 135010898 | FALSE | cg03743584 | Hypomethylated |
| LAG3      | 12 | 6752344   | FALSE | cg01820374 | Hypomethylated |

|          |    |           |       |            |                |
|----------|----|-----------|-------|------------|----------------|
| GUP1     | 3  | 42718798  | FALSE | cg00407150 | Hypomethylated |
| PIB5PA   | 22 | 29848860  | FALSE | cg27324619 | Hypomethylated |
| TMC4     | 19 | 59368560  | FALSE | cg01427567 | Hypomethylated |
| CNFN     | 19 | 47586293  | TRUE  | cg12973651 | Hypomethylated |
| FPRL2    | 19 | 56989780  | FALSE | cg06784466 | Hypomethylated |
| SP2      | 17 | 43347121  | FALSE | cg14360917 | Hypomethylated |
| INPP5B   | 1  | 38185275  | FALSE | cg10784030 | Hypomethylated |
| TRIM38   | 6  | 26070546  | FALSE | cg22502502 | Hypomethylated |
| TSP50    | 3  | 46734453  | TRUE  | cg19668234 | Hypomethylated |
| CREB5    | 7  | 28305282  | FALSE | cg10822172 | Hypomethylated |
| CCR1     | 3  | 46224989  | FALSE | cg12441928 | Hypomethylated |
| PAX1     | 20 | 21627843  | FALSE | cg24401441 | Hypomethylated |
| ID3      | 1  | 23758996  | TRUE  | cg19532954 | Hypomethylated |
| OASL     | 12 | 119961103 | FALSE | cg24997562 | Hypomethylated |
| SYNPO    | 5  | 149999796 | FALSE | cg12172720 | Hypomethylated |
| LUM      | 12 | 90029328  | FALSE | cg10401088 | Hypomethylated |
| MMP19    | 12 | 54522914  | FALSE | cg16725130 | Hypomethylated |
| KCNN4    | 19 | 48977137  | FALSE | cg15977816 | Hypomethylated |
| ABCA6    | 17 | 64649548  | FALSE | cg22081096 | Hypomethylated |
| TRIM38   | 6  | 26071421  | FALSE | cg21844956 | Hypomethylated |
| CARD6    | 5  | 40877336  | FALSE | cg16250754 | Hypomethylated |
| LRRC17   | 7  | 102340529 | FALSE | cg02724472 | Hypomethylated |
| TNFRSF18 | 1  | 1132078   | TRUE  | cg07671976 | Hypomethylated |
| BPI      | 20 | 36364926  | FALSE | cg15494458 | Hypomethylated |
| IRGC     | 19 | 48912054  | FALSE | cg26251865 | Hypomethylated |
| NURIT    | 13 | 45173353  | FALSE | cg16140179 | Hypomethylated |
| NR1H4    | 12 | 99391640  | FALSE | cg15381313 | Hypomethylated |
| BTN3A3   | 6  | 26548763  | FALSE | cg25193278 | Hypomethylated |
| SH3BGR   | 21 | 39739515  | TRUE  | cg19946699 | Hypomethylated |
| MYO1F    | 19 | 8548301   | FALSE | cg27582235 | Hypomethylated |
| TFEC     | 7  | 115458040 | FALSE | cg04663487 | Hypomethylated |
| PTPRH    | 19 | 60413450  | FALSE | cg07097098 | Hypomethylated |
| IL32     | 16 | 3055553   | FALSE | cg18350391 | Hypomethylated |
| TNFRSF1A | 12 | 6321391   | FALSE | cg00973286 | Hypomethylated |
| GSTA3    | 6  | 52881670  | FALSE | cg02075593 | Hypomethylated |
| ADAMTSL5 | 19 | 1463314   | FALSE | cg04601137 | Hypomethylated |
| SLC15A2  | 3  | 123095646 | TRUE  | cg10523671 | Hypomethylated |
| RPE65    | 1  | 68688486  | FALSE | cg11724759 | Hypomethylated |
| FBXW10   | 17 | 18588052  | FALSE | cg10762615 | Hypomethylated |
| CYP4F12  | 19 | 15644791  | FALSE | cg05722906 | Hypomethylated |
| G1P3     | 1  | 27871290  | FALSE | cg20227766 | Hypomethylated |
| SLC22A14 | 3  | 38322396  | FALSE | cg16558203 | Hypomethylated |
| TNFSF13B | 13 | 107719053 | FALSE | cg09646392 | Hypomethylated |
| FLJ20581 | 16 | 20328217  | FALSE | cg10938486 | Hypomethylated |
| IBSP     | 4  | 88939570  | FALSE | cg03296929 | Hypomethylated |
| FAM12B   | 14 | 20306146  | FALSE | cg12376406 | Hypomethylated |
| ATN1     | 12 | 6904172   | FALSE | cg01437411 | Hypomethylated |

|          |    |           |       |            |                |
|----------|----|-----------|-------|------------|----------------|
| MRV1     | 11 | 10672171  | FALSE | cg24365867 | Hypomethylated |
| ORM1     | 9  | 116124423 | FALSE | cg12927617 | Hypomethylated |
| AMBN     | 4  | 71492427  | FALSE | cg13523386 | Hypomethylated |
| P2RX7    | 12 | 120055258 | TRUE  | cg07602200 | Hypomethylated |
| NR5A1    | 9  | 126309628 | TRUE  | cg00691625 | Hypomethylated |
| SMPDL3B  | 1  | 28133954  | FALSE | cg22421699 | Hypomethylated |
| XLKD1    | 11 | 10546858  | FALSE | cg03908676 | Hypomethylated |
| CD209    | 19 | 7718265   | FALSE | cg01618851 | Hypomethylated |
| BRD4     | 19 | 15252124  | FALSE | cg02533173 | Hypomethylated |
| PLA2G4E  | 15 | 40077231  | FALSE | cg15228639 | Hypomethylated |
| TPM3     | 1  | 152431575 | FALSE | cg12205230 | Hypomethylated |
| KCNQ1    | 11 | 2784940   | TRUE  | cg16609872 | Hypomethylated |
| LONRF2   | 2  | 100293082 | FALSE | cg12232463 | Hypomethylated |
| PHKG1    | 7  | 56128022  | FALSE | cg05724065 | Hypomethylated |
| CASP10   | 2  | 201756345 | FALSE | cg12105450 | Hypomethylated |
| DSPG3    | 12 | 89924248  | FALSE | cg13798376 | Hypomethylated |
| FHL2     | 2  | 105421438 | FALSE | cg10635061 | Hypomethylated |
| EBI3     | 19 | 4180509   | FALSE | cg19529363 | Hypomethylated |
| KIAA0020 | 9  | 2828508   | FALSE | cg24471894 | Hypomethylated |
| ANGPTL2  | 9  | 128925551 | FALSE | cg09427311 | Hypomethylated |
| FLJ42393 | 3  | 189378916 | FALSE | cg21909391 | Hypomethylated |
| SLC15A2  | 3  | 123096393 | FALSE | cg18636558 | Hypomethylated |
| SFTPD    | 10 | 81698971  | FALSE | cg03600318 | Hypomethylated |
| LYST     | 1  | 234113657 | FALSE | cg12167564 | Hypomethylated |
| INHBC    | 12 | 56114782  | FALSE | cg08640498 | Hypomethylated |
| ACOT11   | 1  | 54786297  | FALSE | cg10266490 | Hypomethylated |
| PIB5PA   | 22 | 29848963  | FALSE | cg18053607 | Hypomethylated |
| CMA1     | 14 | 24047613  | FALSE | cg08020808 | Hypomethylated |
| GIMAP1   | 7  | 150044613 | FALSE | cg12914657 | Hypomethylated |
| TAGAP    | 6  | 159386446 | FALSE | cg05103623 | Hypomethylated |
| C1orf85  | 1  | 154531899 | FALSE | cg22377142 | Hypomethylated |
| C10orf26 | 10 | 104526111 | FALSE | cg09405083 | Hypomethylated |
| LGP2     | 17 | 37518341  | FALSE | cg16762195 | Hypomethylated |
| JPH4     | 14 | 23118395  | FALSE | cg06536578 | Hypomethylated |
| G6PC     | 17 | 38306255  | FALSE | cg26673195 | Hypomethylated |
| IL7R     | 5  | 35892887  | FALSE | cg04312209 | Hypomethylated |
| OR2W1    | 6  | 29121315  | FALSE | cg25133685 | Hypomethylated |
| DARC     | 1  | 157441234 | FALSE | cg18552413 | Hypomethylated |
| FLJ25422 | 5  | 36337851  | FALSE | cg24237439 | Hypomethylated |
| PTPN7    | 1  | 200397543 | FALSE | cg23506842 | Hypomethylated |
| GBGT1    | 9  | 135028511 | TRUE  | cg01169778 | Hypomethylated |
| FLJ34503 | 6  | 114331999 | FALSE | cg19815376 | Hypomethylated |
| LHX3     | 9  | 138237697 | FALSE | cg14091657 | Hypomethylated |
| RARRES3  | 11 | 63060913  | FALSE | cg25599242 | Hypomethylated |
| CFHR4    | 1  | 195010295 | FALSE | cg04614339 | Hypomethylated |
| FAM107A  | 3  | 58538309  | FALSE | cg06638451 | Hypomethylated |
| CST9L    | 20 | 23497455  | FALSE | cg27655855 | Hypomethylated |

|          |    |           |       |            |                |
|----------|----|-----------|-------|------------|----------------|
| PLAT     | 8  | 42183830  | FALSE | cg22038738 | Hypomethylated |
| GBP1     | 1  | 89303252  | FALSE | cg13406950 | Hypomethylated |
| KCNG4    | 16 | 82830658  | FALSE | cg11913615 | Hypomethylated |
| ATN1     | 12 | 6903824   | FALSE | cg22475430 | Hypomethylated |
| IFI35    | 17 | 38412815  | FALSE | cg08090640 | Hypomethylated |
| GSTA3    | 6  | 52883168  | FALSE | cg04340502 | Hypomethylated |
| RHD      | 1  | 25471465  | FALSE | cg06388544 | Hypomethylated |
| GIMAP2   | 7  | 150013657 | FALSE | cg25918245 | Hypomethylated |
| SLC18A1  | 8  | 20084934  | FALSE | cg22441882 | Hypomethylated |
| TRIP6    | 7  | 100303561 | FALSE | cg01274660 | Hypomethylated |
| PTH      | 11 | 13475601  | FALSE | cg24816298 | Hypomethylated |
| LYST     | 1  | 234113562 | FALSE | cg02829654 | Hypomethylated |
| SLC12A6  | 15 | 32398301  | FALSE | cg14307212 | Hypomethylated |
| OLFML3   | 1  | 114323095 | FALSE | cg20618842 | Hypomethylated |
| GPR44    | 11 | 60379720  | FALSE | cg04754011 | Hypomethylated |
| NRIP2    | 12 | 2814741   | FALSE | cg05194726 | Hypomethylated |
| MYOZ3    | 5  | 150020473 | FALSE | cg14600885 | Hypomethylated |
| CYP2A7   | 19 | 46081197  | FALSE | cg25427638 | Hypomethylated |
| KLK10    | 19 | 56216502  | FALSE | cg19356189 | Hypomethylated |
| MRGPRX2  | 11 | 19038166  | FALSE | cg22051636 | Hypomethylated |
| KLF11    | 2  | 10101754  | TRUE  | cg20389709 | Hypomethylated |
| P518     | 9  | 132758787 | TRUE  | cg03924115 | Hypomethylated |
| NAT8     | 2  | 73723682  | FALSE | cg09172980 | Hypomethylated |
| ID2      | 2  | 8739739   | TRUE  | cg13055278 | Hypomethylated |
| GGTLA1   | 22 | 22971654  | FALSE | cg15448245 | Hypomethylated |
| ADORA1   | 1  | 201325577 | FALSE | cg11719784 | Hypomethylated |
| DEFA1    | 8  | 6825434   | FALSE | cg17267907 | Hypomethylated |
| TAT      | 16 | 70168544  | FALSE | cg22136365 | Hypomethylated |
| CLEC4C   | 12 | 7794437   | FALSE | cg01120761 | Hypomethylated |
| FLJ45964 | 2  | 240165186 | FALSE | cg17977362 | Hypomethylated |
