# Supplementary material for: Epigenetic Disruption of the PIWI Pathway in Human Spermatogenic Disorders
Source: PubMed Central journal article supplement (PMC3480440; doi:10.1371/journal.pone.0047892), 2012-10-24
Supplement: pone.0047892.s006.pdf [file pone.0047892.s006.pdf]

**Supplementary table S4:** Differentially methylated gene promoters overlapping piRNAs.

| <b>Gene symbol</b> | <b>piRNA</b> | <b>piRNA start</b> | <b>piRNA end</b> | <b>Transcription start site</b> |
|--------------------|--------------|--------------------|------------------|---------------------------------|
| DPM1               | DQ600332     | 49575937           | 49575966         | 49575060                        |
| GPR156             | DQ601878     | 119965297          | 119965325        | 119963325                       |
| HIST1H2AA          | DQ583568     | 25727116           | 25727142         | 25726291                        |
| HIST1H2AA          | DQ583569     | 25727116           | 25727143         | 25726291                        |
| HIST1H2AA          | DQ583570     | 25727116           | 25727144         | 25726291                        |
| HIST1H2AA          | DQ577170     | 25727151           | 25727181         | 25726291                        |
| HIST1H2AA          | DQ571051     | 25727508           | 25727538         | 25726291                        |
| IL16               | DQ578799     | 81588605           | 81588631         | 81589268                        |
| IL16               | DQ592408     | 81590178           | 81590207         | 81591720                        |
| KLK1               | DQ575553     | 51328726           | 51328755         | 51327043                        |
| RAB24              | DQ576332     | 176731696          | 176731722        | 176728199                       |
| RAB24              | DQ576332     | 176731696          | 176731722        | 176728199                       |
| SMPD3              | DQ594877     | 68483599           | 68483628         | 68482409                        |
