# Supplementary material for: Epigenetic Disruption of the PIWI Pathway in Human Spermatogenic Disorders
Source: PLoS One. 2012 Oct 24;7(10):e47892. doi: 10.1371/journal.pone.0047892 (PMC3480440; doi:10.1371/journal.pone.0047892)
Supplement: Table S3 — Gene ontology analysis of differentially methylated genes in SpF. (PDF) [file pone.0047892.s005.pdf]

**Supplementary table S3:** Gene ontology analysis of differentially methylated genes in SpF.

**Hypermethylated in SpF**

| <b>Term</b>                                      | <b>Fisher Exact</b> | <b>GO category</b>     |
|--------------------------------------------------|---------------------|------------------------|
| female pregnancy                                 | 8,2E-5              | Biological process (3) |
| germ-line stem cell maintenance                  | 1,6E-4              | Biological process (3) |
| digestive system process                         | 9,2E-3              | Biological process (3) |
| ovulation cycle                                  | 1,1E-2              | Biological process (3) |
| sex differentiation                              | 1,3E-2              | Biological process (3) |
| male sex differentiation                         | 1,4E-2              | Biological process (3) |
| ovarian follicle development                     | 1,5E-2              | Biological process (3) |
| regulation of cell size                          | 1,7E-2              | Biological process (3) |
| reproductive cellular process                    | 1,8E-2              | Biological process (3) |
| reproductive process in a multicellular organism | 2,2E-2              | Biological process (3) |
| gamete generation                                | 3,0E-2              | Biological process (3) |
| mitochondrion organization                       | 3,2E-2              | Biological process (3) |
| circulatory system process                       | 3,2E-2              | Biological process (3) |
| secretion                                        | 3,9E-2              | Biological process (3) |
| negative regulation of cell proliferation        | 4,2E-2              | Biological process (3) |
| male gamete generation                           | 4,4E-2              | Biological process (3) |

| <b>Term</b>                                                              | <b>Fisher Exact</b> | <b>GO category</b>     |
|--------------------------------------------------------------------------|---------------------|------------------------|
| germ-line stem cell maintenance                                          | 1,5E-4              | Biological process (5) |
| pancreatic juice secretion                                               | 9,0E-4              | Biological process (5) |
| positive regulation of myeloid leukocyte differentiation                 | 1,3E-3              | Biological process (5) |
| negative regulation of mitotic cell cycle                                | 2,4E-3              | Biological process (5) |
| stem cell maintenance                                                    | 3,5E-3              | Biological process (5) |
| stem cell development                                                    | 3,9E-3              | Biological process (5) |
| gene silencing                                                           | 5,0E-3              | Biological process (5) |
| positive regulation of myeloid cell differentiation                      | 7,7E-3              | Biological process (5) |
| male sex differentiation                                                 | 1,3E-2              | Biological process (5) |
| cartilage development                                                    | 1,3E-2              | Biological process (5) |
| ovarian follicle development                                             | 1,4E-2              | Biological process (5) |
| regulation of myeloid leukocyte differentiation                          | 1,4E-2              | Biological process (5) |
| meiosis I                                                                | 1,5E-2              | Biological process (5) |
| regulation of gene expression, epigenetic                                | 1,5E-2              | Biological process (5) |
| ribonucleotide biosynthetic process                                      | 1,9E-2              | Biological process (5) |
| nucleobase, nucleoside, nucleotide and nucleic acid biosynthetic process | 3,3E-2              | Biological process (5) |
| nucleobase, nucleoside and nucleotide                                    | 3,3E-2              | Biological process (5) |

|                                           |        |                        |
|-------------------------------------------|--------|------------------------|
| biosynthetic process                      |        |                        |
| negative regulation of cell proliferation | 3,5E-2 | Biological process (5) |
| spermatogenesis                           | 3,8E-2 | Biological process (5) |

### Hypomethylated in SpF

| Term                                           | Fisher Exact | GO category            |
|------------------------------------------------|--------------|------------------------|
| defense response                               | 1,2E-7       | Biological process (3) |
| regulation of immune system process            | 2,8E-7       | Biological process (3) |
| taxis                                          | 7,5E-7       | Biological process (3) |
| chemotaxis                                     | 7,5E-7       | Biological process (3) |
| positive regulation of biological process      | 7,8E-7       | Biological process (3) |
| positive regulation of cellular process        | 1,1E-6       | Biological process (3) |
| cell chemotaxis                                | 1,5E-6       | Biological process (3) |
| locomotory behavior                            | 1,5E-5       | Biological process (3) |
| leukocyte chemotaxis                           | 1,6E-5       | Biological process (3) |
| regulation of response to stimulus             | 2,0E-5       | Biological process (3) |
| regulation of multicellular organismal process | 2,1E-5       | Biological process (3) |
| regulation of immune response                  | 3,3E-5       | Biological process (3) |
| regulation of leukocyte activation             | 3,7E-5       | Biological process (3) |
| response to wounding                           | 4,1E-5       | Biological process (3) |
| positive regulation of response to stimulus    | 5,2E-5       | Biological process (3) |
| positive regulation of immune system process   | 5,6E-5       | Biological process (3) |
| positive regulation of protein transport       | 5,9E-5       | Biological process (3) |
| positive regulation of immune response         | 6,1E-5       | Biological process (3) |
| regulation of cell activation                  | 6,1E-5       | Biological process (3) |
| regulation of cellular localization            | 8,6E-5       | Biological process (3) |
| immune effector process                        | 1,7E-4       | Biological process (3) |
| negative regulation of immune system process   | 2,3E-4       | Biological process (3) |
| regulation of transport                        | 2,7E-4       | Biological process (3) |
| homeostatic process                            | 3,2E-4       | Biological process (3) |
| positive regulation of protein secretion       | 3,3E-4       | Biological process (3) |
| regulation of cytokine production              | 3,7E-4       | Biological process (3) |
| positive regulation of cell proliferation      | 4,6E-4       | Biological process (3) |
| positive regulation of immune effector process | 4,7E-4       | Biological process (3) |
| regulation of leukocyte mediated cytotoxicity  | 4,7E-4       | Biological process (3) |
| positive regulation of transport               | 5,1E-4       | Biological process (3) |
| multicellular organismal catabolic process     | 5,5E-4       | Biological process (3) |
| regulation of cell killing                     | 7,3E-4       | Biological process (3) |
| regulation of localization                     | 7,6E-4       | Biological process (3) |
| cell volume homeostasis                        | 1,0E-3       | Biological process (3) |
| regulation of protein localization             | 1,1E-3       | Biological process (3) |
| humoral immune response                        | 1,1E-3       | Biological process (3) |
| phospholipid translocation                     | 1,3E-3       | Biological process (3) |
| response to other organism                     | 1,3E-3       | Biological process (3) |

|                                                           |        |                        |
|-----------------------------------------------------------|--------|------------------------|
| regulation of cell proliferation                          | 1,5E-3 | Biological process (3) |
| negative regulation of leukocyte activation               | 1,5E-3 | Biological process (3) |
| leukocyte mediated immunity                               | 1,7E-3 | Biological process (3) |
| negative regulation of cell activation                    | 2,1E-3 | Biological process (3) |
| response to bacterium                                     | 2,4E-3 | Biological process (3) |
| tissue homeostasis                                        | 2,4E-3 | Biological process (3) |
| regulation of response to external stimulus               | 2,6E-3 | Biological process (3) |
| regulation of response to stress                          | 2,7E-3 | Biological process (3) |
| positive regulation of homeostatic process                | 2,8E-3 | Biological process (3) |
| positive regulation of calcium ion transport into cytosol | 3,1E-3 | Biological process (3) |
| negative regulation of glutamate secretion                | 3,2E-3 | Biological process (3) |
| positive regulation of ion transport                      | 3,4E-3 | Biological process (3) |
| positive regulation of leukocyte mediated cytotoxicity    | 3,5E-3 | Biological process (3) |
| innate immune response                                    | 4,5E-3 | Biological process (3) |
| positive regulation of defense response                   | 4,6E-3 | Biological process (3) |
| cellular alkene metabolic process                         | 4,6E-3 | Biological process (3) |
| tissue development                                        | 4,8E-3 | Biological process (3) |
| positive regulation of leukocyte activation               | 5,0E-3 | Biological process (3) |
| positive regulation of cell killing                       | 5,2E-3 | Biological process (3) |
| positive regulation of secretion                          | 5,7E-3 | Biological process (3) |
| response to virus                                         | 5,7E-3 | Biological process (3) |
| positive regulation of cell activation                    | 6,2E-3 | Biological process (3) |
| negative regulation of hormone secretion                  | 6,5E-3 | Biological process (3) |
| positive regulation of organelle organization             | 7,8E-3 | Biological process (3) |
| regulation of binding                                     | 7,9E-3 | Biological process (3) |
| negative regulation of lipid metabolic process            | 8,0E-3 | Biological process (3) |
| lymphocyte homeostasis                                    | 8,0E-3 | Biological process (3) |
| cell migration                                            | 8,3E-3 | Biological process (3) |
| regulation of calcium ion transport into cytosol          | 8,9E-3 | Biological process (3) |
| negative regulation of secretion                          | 8,9E-3 | Biological process (3) |
| leukocyte activation                                      | 1,0E-2 | Biological process (3) |
| multicellular organismal macromolecule metabolic process  | 1,1E-2 | Biological process (3) |
| negative regulation of multicellular organismal process   | 1,1E-2 | Biological process (3) |
| signal transduction                                       | 1,2E-2 | Biological process (3) |
| regulation of angiogenesis                                | 1,4E-2 | Biological process (3) |
| organ development                                         | 1,5E-2 | Biological process (3) |
| positive regulation of response to external stimulus      | 1,5E-2 | Biological process (3) |
| cell-substrate adhesion                                   | 1,5E-2 | Biological process (3) |
| positive regulation of locomotion                         | 1,5E-2 | Biological process (3) |
| negative regulation of transport                          | 1,5E-2 | Biological process (3) |
| response to drug                                          | 1,5E-2 | Biological process (3) |
| regulation of organelle organization                      | 1,6E-2 | Biological process (3) |
| positive regulation of macromolecule metabolic process    | 1,6E-2 | Biological process (3) |

|                                                        |        |                        |
|--------------------------------------------------------|--------|------------------------|
| cell motility                                          | 1,7E-2 | Biological process (3) |
| negative regulation of biological process              | 1,7E-2 | Biological process (3) |
| positive regulation of cellular component organization | 1,9E-2 | Biological process (3) |
| regulation of cell death                               | 1,9E-2 | Biological process (3) |
| regulation of developmental process                    | 2,3E-2 | Biological process (3) |
| positive regulation of cell communication              | 2,5E-2 | Biological process (3) |
| cellular chemical homeostasis                          | 2,7E-2 | Biological process (3) |
| lymphocyte activation                                  | 2,9E-2 | Biological process (3) |
| positive regulation of biosynthetic process            | 3,0E-2 | Biological process (3) |
| positive regulation of metabolic process               | 3,3E-2 | Biological process (3) |
| regulation of cell communication                       | 3,5E-2 | Biological process (3) |
| secretion                                              | 3,5E-2 | Biological process (3) |
| positive regulation of cellular metabolic process      | 3,8E-2 | Biological process (3) |
| transmembrane transport                                | 4,5E-2 | Biological process (3) |
| negative regulation of cellular process                | 4,9E-2 | Biological process (3) |

| <b>Term</b>                                                                                                                                      | <b>Fisher Exact</b> | <b>GO category</b>     |
|--------------------------------------------------------------------------------------------------------------------------------------------------|---------------------|------------------------|
| chemotaxis                                                                                                                                       | 3,7E-7              | Biological process (5) |
| cell chemotaxis                                                                                                                                  | 9,8E-7              | Biological process (5) |
| leukocyte chemotaxis                                                                                                                             | 1,1E-5              | Biological process (5) |
| regulation of leukocyte activation                                                                                                               | 2,1E-5              | Biological process (5) |
| positive regulation of immune response                                                                                                           | 3,6E-5              | Biological process (5) |
| positive regulation of protein transport                                                                                                         | 4,0E-5              | Biological process (5) |
| positive regulation of adaptive immune response based on somatic recombination of immune receptors built from immunoglobulin superfamily domains | 5,4E-5              | Biological process (5) |
| protein kinase cascade                                                                                                                           | 6,2E-5              | Biological process (5) |
| positive regulation of adaptive immune response                                                                                                  | 6,4E-5              | Biological process (5) |
| positive regulation of leukocyte mediated immunity                                                                                               | 1,0E-4              | Biological process (5) |
| positive regulation of lymphocyte mediated immunity                                                                                              | 1,0E-4              | Biological process (5) |
| regulation of lymphocyte mediated immunity                                                                                                       | 1,0E-4              | Biological process (5) |
| regulation of adaptive immune response based on somatic recombination of immune receptors built from immunoglobulin superfamily domains          | 1,1E-4              | Biological process (5) |
| regulation of adaptive immune response                                                                                                           | 1,3E-4              | Biological process (5) |
| regulation of secretion                                                                                                                          | 1,3E-4              | Biological process (5) |
| leukocyte migration                                                                                                                              | 1,4E-4              | Biological process (5) |
| negative regulation of macrophage activation                                                                                                     | 1,9E-4              | Biological process (5) |
| regulation of protein transport                                                                                                                  | 2,0E-4              | Biological process (5) |
| regulation of leukocyte mediated immunity                                                                                                        | 2,0E-4              | Biological process (5) |
| positive regulation of cell proliferation                                                                                                        | 2,3E-4              | Biological process (5) |
| regulation of lymphocyte activation                                                                                                              | 2,3E-4              | Biological process (5) |
| positive regulation of protein secretion                                                                                                         | 2,5E-4              | Biological process (5) |
| regulation of establishment of protein localization                                                                                              | 2,9E-4              | Biological process (5) |
| positive regulation of transport                                                                                                                 | 3,0E-4              | Biological process (5) |

|                                                                   |        |                        |
|-------------------------------------------------------------------|--------|------------------------|
| positive regulation of immune effector process                    | 3,5E-4 | Biological process (5) |
| regulation of leukocyte mediated cytotoxicity                     | 3,7E-4 | Biological process (5) |
| regulation of immune effector process                             | 5,3E-4 | Biological process (5) |
| negative regulation of lipid catabolic process                    | 6,9E-4 | Biological process (5) |
| regulation of glutamate secretion                                 | 6,9E-4 | Biological process (5) |
| cell volume homeostasis                                           | 8,7E-4 | Biological process (5) |
| regulation of defense response                                    | 8,9E-4 | Biological process (5) |
| regulation of metal ion transport                                 | 9,4E-4 | Biological process (5) |
| defense response to bacterium                                     | 9,8E-4 | Biological process (5) |
| lipid translocation                                               | 1,1E-3 | Biological process (5) |
| phospholipid translocation                                        | 1,1E-3 | Biological process (5) |
| negative regulation of interleukin-2 biosynthetic process         | 1,1E-3 | Biological process (5) |
| negative regulation of leukocyte activation                       | 1,2E-3 | Biological process (5) |
| regulation of T cell activation                                   | 1,3E-3 | Biological process (5) |
| regulation of protein secretion                                   | 1,3E-3 | Biological process (5) |
| negative regulation of cell activation                            | 1,6E-3 | Biological process (5) |
| tissue homeostasis                                                | 1,8E-3 | Biological process (5) |
| regulation of interleukin-2 biosynthetic process                  | 2,2E-3 | Biological process (5) |
| positive regulation of homeostatic process                        | 2,3E-3 | Biological process (5) |
| positive regulation of lymphocyte activation                      | 2,4E-3 | Biological process (5) |
| tissue development                                                | 2,4E-3 | Biological process (5) |
| acute inflammatory response                                       | 2,5E-3 | Biological process (5) |
| positive regulation of calcium ion transport into cytosol         | 2,6E-3 | Biological process (5) |
| regulation of ion transport                                       | 2,6E-3 | Biological process (5) |
| positive regulation of ion transport                              | 2,7E-3 | Biological process (5) |
| peptide cross-linking via chondroitin 4-sulfate glycosaminoglycan | 2,8E-3 | Biological process (5) |
| negative regulation of glutamate secretion                        | 2,8E-3 | Biological process (5) |
| cytokine-mediated signaling pathway                               | 2,9E-3 | Biological process (5) |
| positive regulation of leukocyte mediated cytotoxicity            | 3,0E-3 | Biological process (5) |
| regulation of transcription factor activity                       | 3,2E-3 | Biological process (5) |
| positive regulation of defense response                           | 3,5E-3 | Biological process (5) |
| positive regulation of leukocyte activation                       | 3,7E-3 | Biological process (5) |
| response to mercury ion                                           | 3,9E-3 | Biological process (5) |
| positive regulation of T cell activation                          | 4,2E-3 | Biological process (5) |
| regulation of inflammatory response                               | 4,2E-3 | Biological process (5) |
| positive regulation of secretion                                  | 4,2E-3 | Biological process (5) |
| positive regulation of cell activation                            | 4,6E-3 | Biological process (5) |
| cell migration                                                    | 5,5E-3 | Biological process (5) |
| negative regulation of hormone secretion                          | 5,5E-3 | Biological process (5) |
| regulation of lipid catabolic process                             | 5,5E-3 | Biological process (5) |
| unsaturated fatty acid metabolic process                          | 5,5E-3 | Biological process (5) |
| regulation of lymphocyte proliferation                            | 6,1E-3 | Biological process (5) |
| positive regulation of organelle organization                     | 6,1E-3 | Biological process (5) |
| regulation of leukocyte proliferation                             | 6,4E-3 | Biological process (5) |

|                                                           |        |                        |
|-----------------------------------------------------------|--------|------------------------|
| regulation of mononuclear cell proliferation              | 6,4E-3 | Biological process (5) |
| positive regulation of transferase activity               | 6,7E-3 | Biological process (5) |
| negative regulation of lipid metabolic process            | 6,8E-3 | Biological process (5) |
| positive regulation of lymphocyte proliferation           | 7,3E-3 | Biological process (5) |
| negative regulation of secretion                          | 7,3E-3 | Biological process (5) |
| regulation of calcium ion transport into cytosol          | 7,5E-3 | Biological process (5) |
| complement activation, classical pathway                  | 7,5E-3 | Biological process (5) |
| blood vessel development                                  | 7,6E-3 | Biological process (5) |
| positive regulation of leukocyte proliferation            | 7,7E-3 | Biological process (5) |
| positive regulation of mononuclear cell proliferation     | 7,7E-3 | Biological process (5) |
| hexose transport                                          | 8,3E-3 | Biological process (5) |
| regulation of interleukin-2 production                    | 8,3E-3 | Biological process (5) |
| positive regulation of inflammatory response              | 8,3E-3 | Biological process (5) |
| regulation of cytokine secretion                          | 8,3E-3 | Biological process (5) |
| positive regulation of macromolecule metabolic process    | 8,5E-3 | Biological process (5) |
| positive regulation of signal transduction                | 8,6E-3 | Biological process (5) |
| regulation of apoptosis                                   | 8,7E-3 | Biological process (5) |
| vasculature development                                   | 8,8E-3 | Biological process (5) |
| positive regulation of protein kinase cascade             | 9,1E-3 | Biological process (5) |
| monosaccharide transport                                  | 9,1E-3 | Biological process (5) |
| regulation of programmed cell death                       | 9,6E-3 | Biological process (5) |
| blood vessel morphogenesis                                | 9,7E-3 | Biological process (5) |
| positive regulation of macromolecule biosynthetic process | 1,0E-2 | Biological process (5) |
| positive regulation of calcium ion transport              | 1,1E-2 | Biological process (5) |
| regulation of amine transport                             | 1,1E-2 | Biological process (5) |
| regulation of angiogenesis                                | 1,2E-2 | Biological process (5) |
| negative regulation of transport                          | 1,2E-2 | Biological process (5) |
| regulation of cytoskeleton organization                   | 1,2E-2 | Biological process (5) |
| positive regulation of response to external stimulus      | 1,2E-2 | Biological process (5) |
| positive regulation of phosphorus metabolic process       | 1,3E-2 | Biological process (5) |
| positive regulation of phosphate metabolic process        | 1,3E-2 | Biological process (5) |
| regulation of interleukin-6 production                    | 1,4E-2 | Biological process (5) |
| leukocyte homeostasis                                     | 1,4E-2 | Biological process (5) |
| negative regulation of catabolic process                  | 1,5E-2 | Biological process (5) |
| positive regulation of cellular biosynthetic process      | 1,6E-2 | Biological process (5) |
| lymphocyte mediated immunity                              | 1,7E-2 | Biological process (5) |
| positive regulation of DNA binding                        | 1,7E-2 | Biological process (5) |
| positive regulation of cell communication                 | 1,7E-2 | Biological process (5) |
| positive regulation of biosynthetic process               | 1,8E-2 | Biological process (5) |
| cellular chemical homeostasis                             | 1,8E-2 | Biological process (5) |
| regulation of cytokine biosynthetic process               | 2,0E-2 | Biological process (5) |
| positive regulation of cellular metabolic process         | 2,1E-2 | Biological process (5) |
| response to lipopolysaccharide                            | 2,3E-2 | Biological process (5) |
| ion homeostasis                                           | 2,9E-2 | Biological process (5) |
| T cell activation                                         | 3,2E-2 | Biological process (5) |

|                                                            |        |                        |
|------------------------------------------------------------|--------|------------------------|
| positive regulation of gene expression                     | 3,3E-2 | Biological process (5) |
| endocytosis                                                | 3,5E-2 | Biological process (5) |
| positive regulation of transcription, DNA-dependent        | 3,6E-2 | Biological process (5) |
| positive regulation of nitrogen compound metabolic process | 3,6E-2 | Biological process (5) |
| positive regulation of RNA metabolic process               | 3,8E-2 | Biological process (5) |
| regulation of signal transduction                          | 3,8E-2 | Biological process (5) |
| epithelium development                                     | 4,0E-2 | Biological process (5) |
